# Supplementary figures and images for: Rice bran supplement ameliorates chronic restraint stress-induced depression-like behaviors in mice
Source: Royal Society of Chemistry journal article supplement (doi:10.1039/d4fo00718b), 2024-01-01

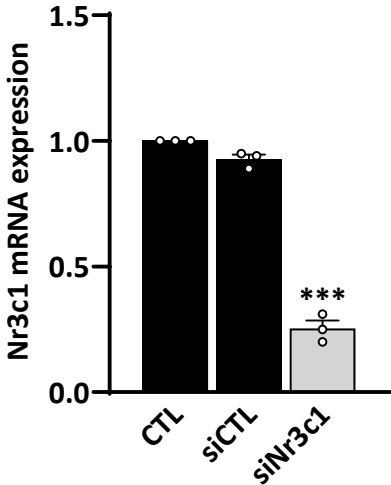

Supplement: d4fo00718b1.pdf [file d4fo00718b1.pdf]

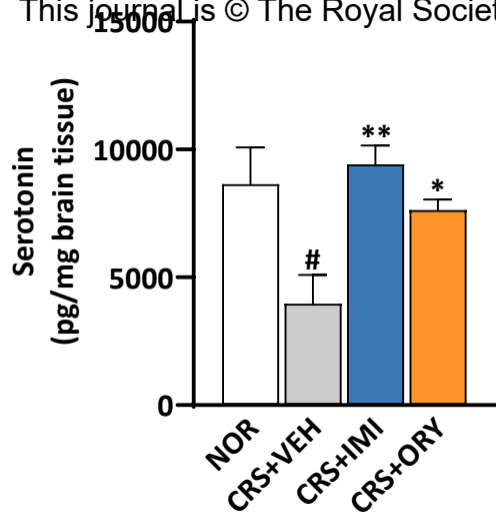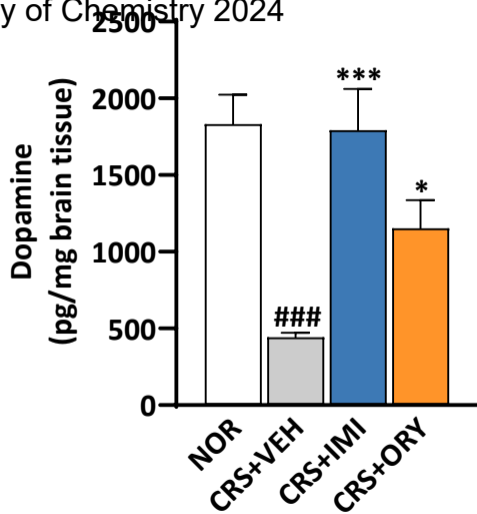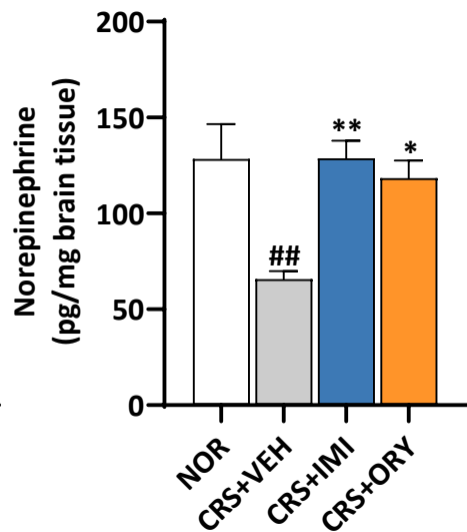

Supplement: d4fo00718b2.pdf [file d4fo00718b2.pdf]

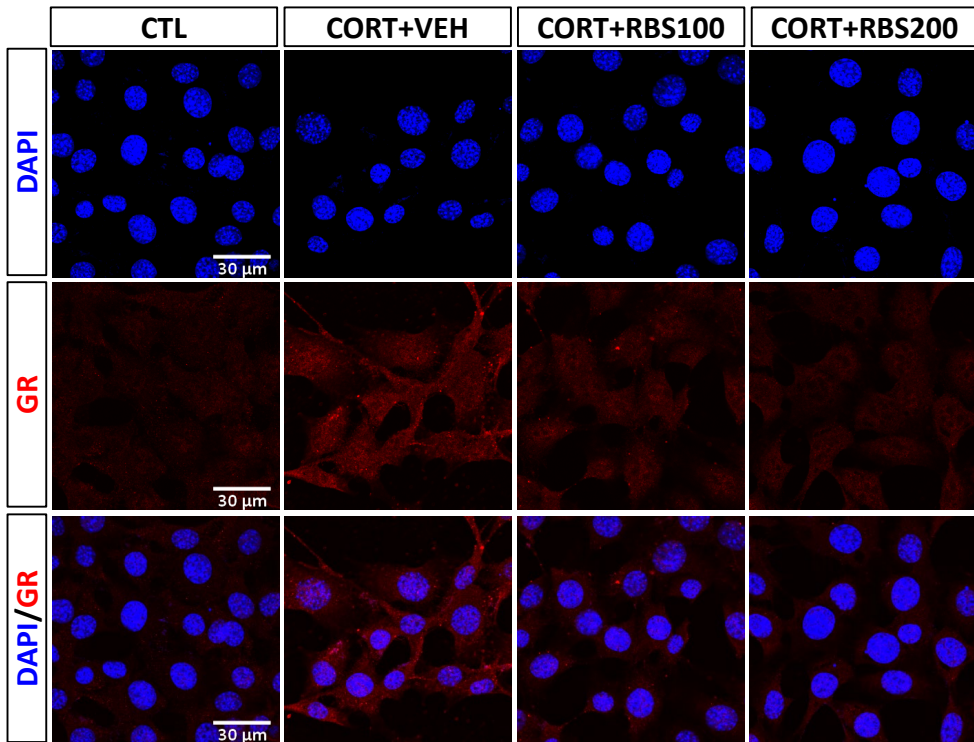

Supplement: d4fo00718b3.pdf [file d4fo00718b3.pdf]
